# Supplementary material for: Cooperation between ETS transcription factor ETV1 and histone demethylase JMJD1A in colorectal cancer
Source: PubMed Central journal article supplement — Int J Oncol. 2020 Oct 14;57(6):1319–32. doi: 10.3892/ijo.2020.5133 (PMC7646594; doi:10.3892/ijo.2020.5133), 2020-10-14
Supplement: Supplementary_Data.pdf [file Supplementary_Data.pdf]

Figure S1. *ETV1* mRNA levels are significantly associated with reduced survival at (A) 1 and 3 years after colorectal cancer diagnosis and also associated with (B) increased disease stage; microarray data were analyzed using the Oncomine database. Similar, *JMJD2A* mRNA levels and their association with (C) survival and (D) disease stage. All data were derived from microarray experiments published by in the study by Smith *et al* (1). JMJD, Jumonji C domain-containing protein.

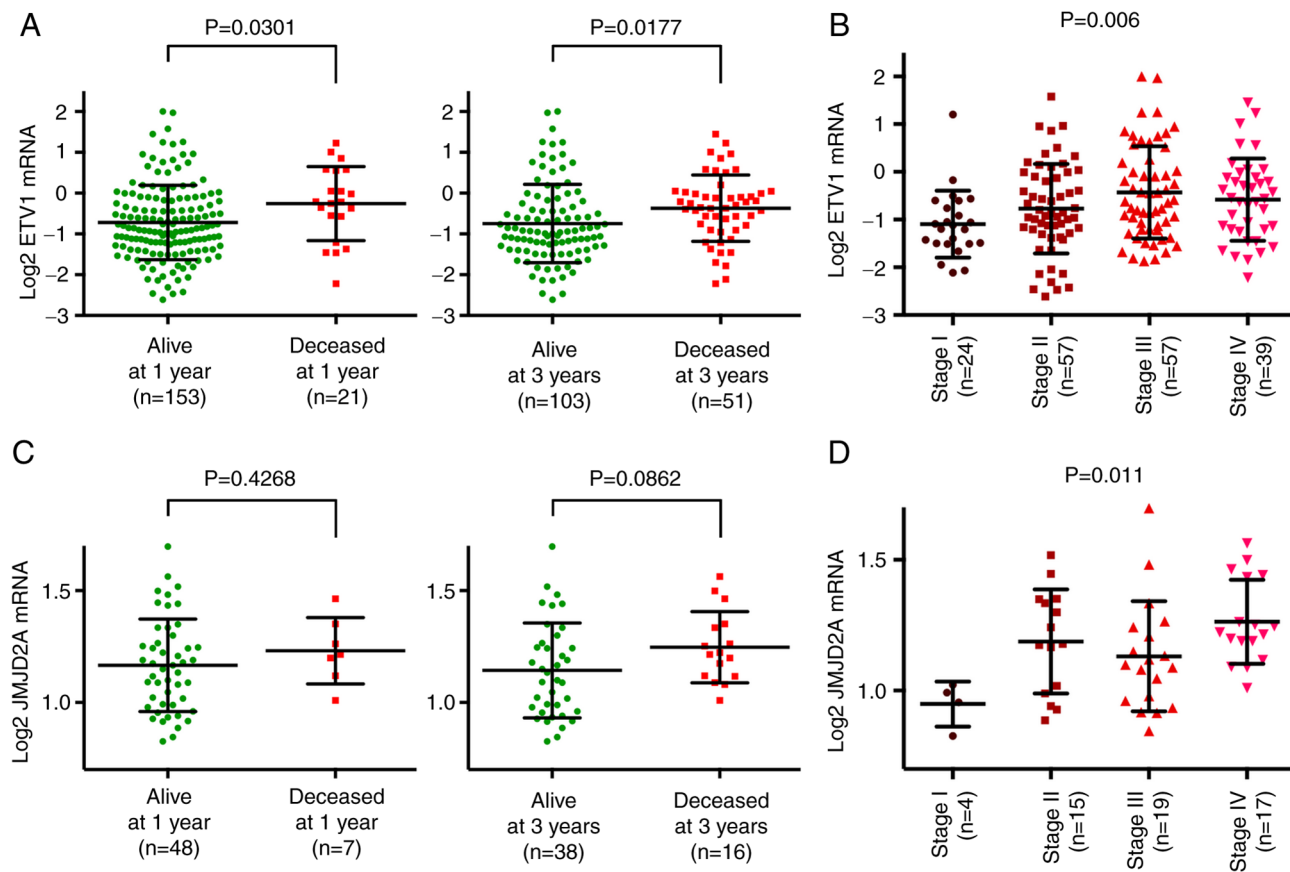

Figure S2. (A) Comparable ectopic expression of JMJD1A and JMJD2A in HCT116 cells as determined by western blotting. Further, ectopic ETV1 expression was unaffected by JMJD1A or JMJD2A co-expression. Asterisk indicates an unspecific band. (B) Activation of the *MMP1* gene promoter by ETV1, JMJD1A and JMJD2A in LNCaP prostate cancer cells. Cells were grown on poly-L-lysine coated 6-wells and transfected with 1  $\mu$ g *MMP1* luciferase reporter plasmid, 1  $\mu$ g pBluescript KS<sup>+</sup>, 10 ng ETV1 expression vector or empty vector pEV3S, and 100 ng JMJD expression vector or empty vector pEV3S utilizing 6  $\mu$ g polyethylenimine. Catalytically inactive JMJD proteins (H1120A/D1122G in case of JMJD1A and H188A in case of JMJD2A) are indicated by the suffix 'mut'. ANOVA (Tukey's multiple comparisons test; n=3). NS, not significant; \*\*\*P<0.001; \*\*\*\*P<0.0001. JMJD, Jumonji C domain-containing protein.

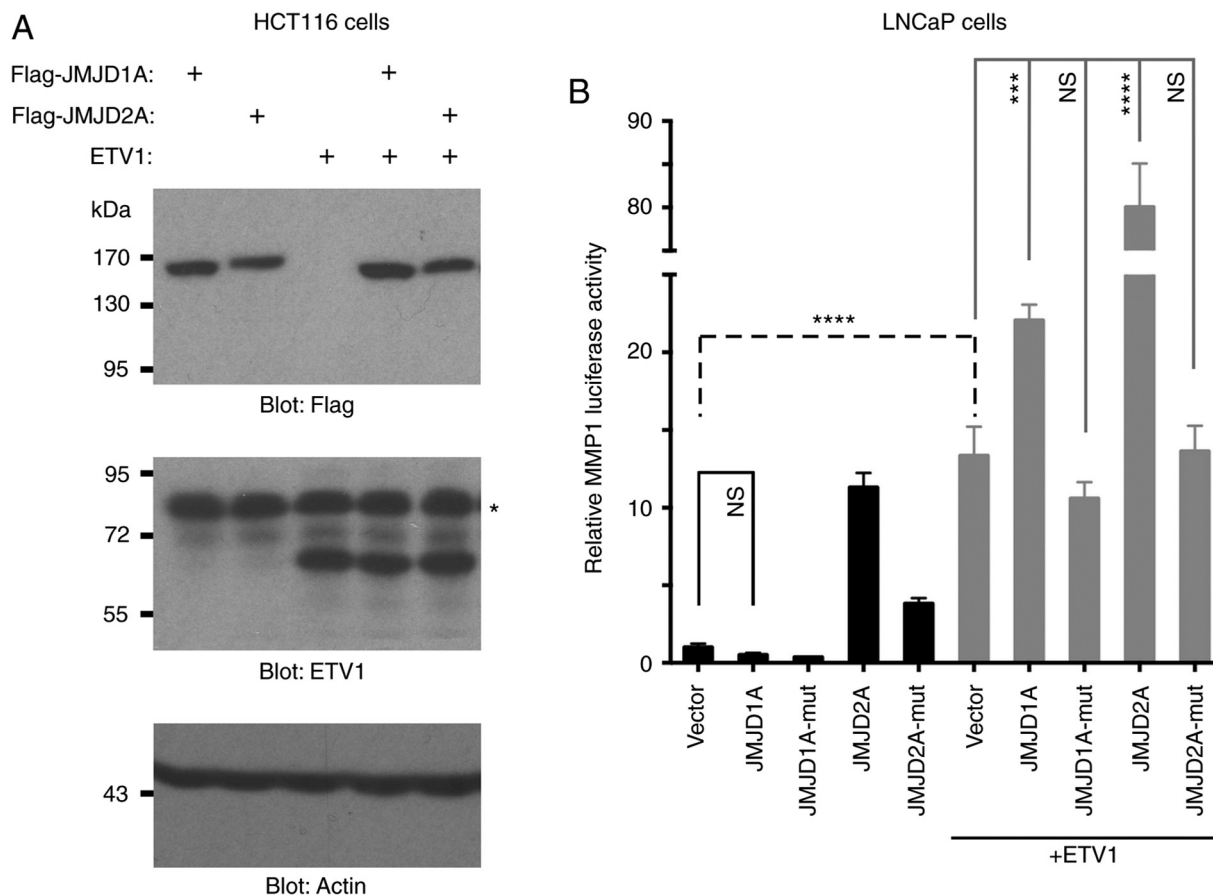

Figure S3. *FOXQ1* and *TBX6* mRNA levels in colorectal cancer. (A) Comparison of normal colorectal tissue to various cancerous samples with regard to *FOXQ1* mRNA levels. Microarray data were derived from the study by Kaiser *et al* (2). ANOVA (Dunnnett's multiple comparisons test); \*\*\* $P < 0.001$ ; \*\*\*\* $P < 0.0001$ . (B and C) Analogous, *FOXQ1* mRNA expression in microarray data published in the study by Skrzypczak *et al* (3) and TCGA (4), respectively. (D-F) Similar, *TBX6* mRNA levels in microarray datasets from TCGA (4), and the studies by Kaiser *et al* (2) and Hong *et al* (5), respectively. Data were analyzed by an unpaired, two-tailed Student's t-test.

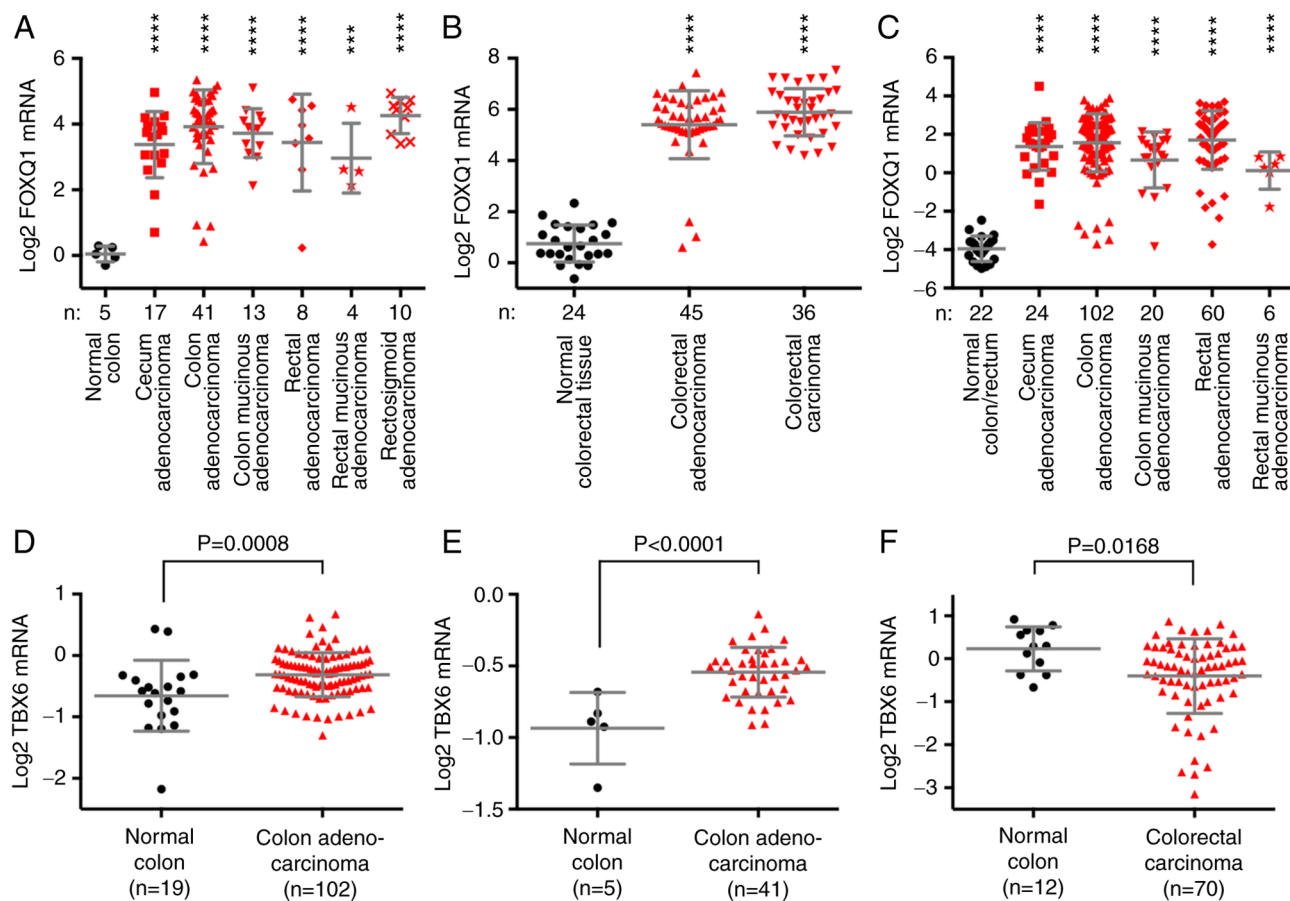

Figure S4. No effect of JMJD2A on *FOXQ1* and *TBX6* mRNA levels in HCT116 colorectal cancer cells is observed. (A) Downregulation of JMJD2A with two different shRNAs. Shown are respective western blots. Rabbit polyclonal antibodies against JMJD2A (A300-861A; Bethyl Laboratories) were utilized. Sequences of the used shRNAs have been described in the study by Kim *et al* (6). (B) *FOXQ1* and *TBX6* expression upon JMJD2A downregulation was determined by RT-qPCR. All mRNA levels were normalized to those of *GAPDH*. Statistical significance was assessed with one-way ANOVA with post hoc Dunnett's multiple comparisons test (n=3). JMJD, Jumonji C domain-containing protein.

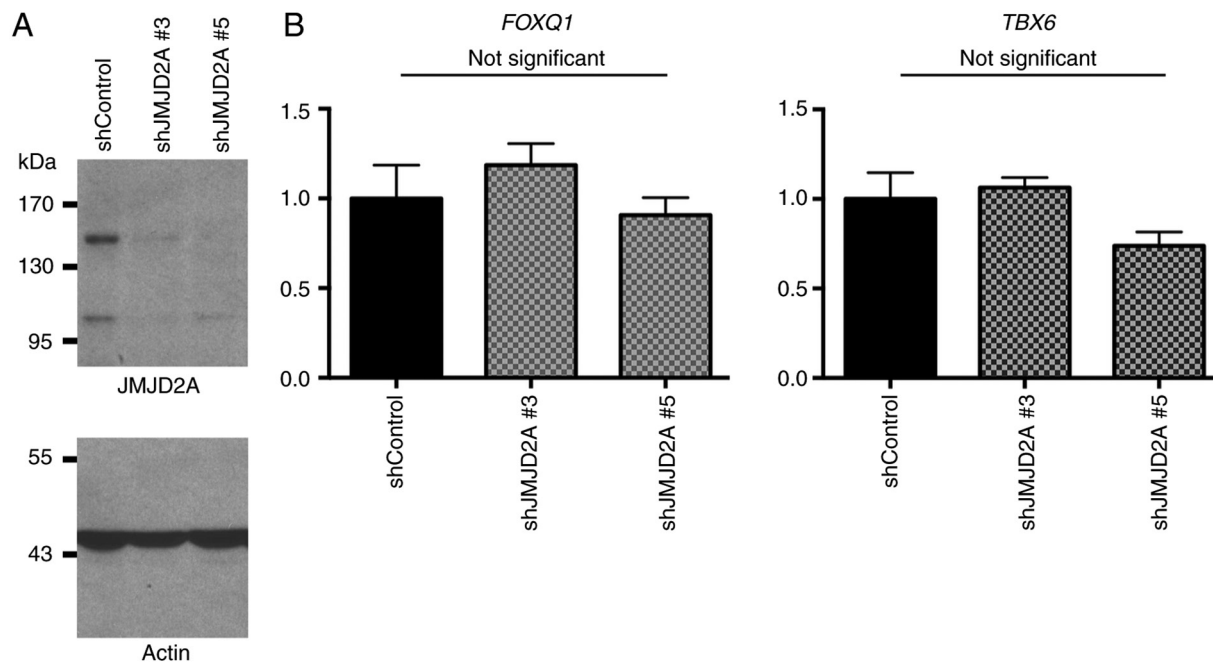

Figure S5. Upstream promoter sequence (2,000 bp) and the first 124 transcribed nucleotides (highlighted by underlining/italics) of the monoxenic human *FOXQ1* gene (NCBI Reference Sequence NM\_033260.4). 5'-GGA<sup>A/T</sup>-3' (or <sup>A/T</sup>TCC in reverse) ETS core binding sequences, to which any ETS transcription factor may or may not bind, are highlighted in yellow color. The consensus binding sequence for human ETV1 is 5'-<sup>A/G</sup><sub>G</sub><sup>C/G</sup><sub>G</sub><sup>C/A</sup><sub>A</sub> GGA<sup>A/T</sup><sup>G/A</sup><sub>T</sub><sup>T/C</sup>-3' (7).

TAGACATAAAAGGTGGGGCAGGTCCTTGCCCCCTTGCCCCAAATGAAATCAGGGTAAGGAGAGGATCCC  
CTGCAGCTGGGGAGGGGAGGAGGTTGGGTAAGAAAGGGGAAAAGTGGGACATGGAGGTGGGGTGAGCCAC  
CTTCCCTGGCGGCGACCAGCATTTCCCTTGGTGGCAGGACACCTTGCCCTGGAGTCTCGAAGAGGCCTCCC  
TTGGACTCTGTAGCGACCACGGGTCCACCTCAAGCCTCCTTGCTTTACCCTTCCCATCAAATAGTCAT  
GTGCCCTCCTGCCCTGCCCAACCCAGAGTTCAAGAGAGAAAAACATTCATTACGAACGCCTTTTATCCC  
TGGCCAAATCCAAGCCTCTTTACCTCGCTATATATATATAGATATACATATTTGTCTCATCCACATCCC  
TCTCCAGGTCTAGTGAACCATCAACTCCAAGGCTAGAGCTGAGCAGACCCCTCCAGAAAGGCTCATCTCC  
CAAAAAGCAGCCATTTCCACACCTGGCTCCCGAGGCGCATACTTAATAAAGTCAGTCTAATCTCCGAACGC  
GATCCCTTCCCAAATACAAAAATAACAGAGCTGTGGCTGGGGCTGTTCATGTTGCCGCCCATTTGTGAAT  
GGCTTCAAAACTCCCTGAATAAAGATAAGAGAGGATTTGTGTACGTTTTCAACACAAATGGTGGAAAGTAA  
TAAAATAAACATCAAAGGTGAGCTCCCACCTACTAGCGGCTCCGTCGCTTTTTGTGCAACAAAGGCA  
AAAAGGAGGAAACTCGGCGTGGCAGGGCAGCGGGCTGGAAAGTGCACCTTCCCGGGGCCGAGGCGCCGCT  
CCCTGGACTAATGACGCCCGCTGGGATCACGCCCCGGGCGCCCTGGGGTGAAGGACGGTCCCCCTTTC  
GAGATTGTCCGACACTGGTGCCAGTGAGGTCACAGCAAAAGTCCCAAAGGAAATTTGGAAAGAAATGGCC  
GTGAACCGTTTTGTTCTTGCCCCCGCCCCGGAAACACGCCCTCTCCGTCGTTCCGTGTTGACTGTCAGAT  
CCCGGAACCAAGCGGCGGAGCTCGGCGGCATCTGAGGCTTCCGCAGGGACACAAGTGCAGGCACAGCCC  
AGCACCTTGCAGCAGACAGCCGCCCCAGGGAAAGAGGAGGACGCTGCTGTCTCCCGCAGGAGTCACC  
AGCCAGGTAAAGAAAAAGGTAAAGTAAGACAAAGAAAAGTGAAAGTCGGAGCCATTTAGTGAGCAAGAG  
TAAAGGTCATCCAAAAAGGCGCATAAATTTCAAGCCAGGAGTGCATTCATTAAAACAAGAAGAAAGA  
CAAGATGGTCCTTGAAAGGAGCTCATAAGGAGGGGCACAGCACAAGGCTCCCGAAAGAGGTCACTGCAAG  
TGTCTTGCACAATTTCTGTTTACGACCTCTGCAGTGACGACAGGGGTTTGTCTTCGTAAGCAGCATCGTT  
TTCACTACTACAGAAGCACATACGCCGCTGCAGCTTAGGCCCGAGCAAAGTCCCTGCTCCCCTAGACCC  
AGTCCCTTACAGGTGTCCCCCTAGGGAACTGTGGCGTGTCCCCCAACCAGGCGCACTCGCCTAAACTGC  
GTCCCCGAACCTCAGGGCGCAGGGAGCCCTCGCGGGCTGCCCGGGCTGGGGCCACACCTGAACGGAGG  
AGCCGGCTGGCGGAGCGGCCCGCGCGCACACACGCACACTCACAGACACGCGCAAACCCACAGCGGC  
GCGCGCGCTCCCCATTGGCGGGAGGAGGAGGGCGGGCCGCGCCGACCCAAAAACAACAACCTGCGCCAGC  
GACTTTGCCGCGCGCTGCAGTGTGGCCTCCGCCTGGTGCAGCGCCCGTTGGGGAGCTGGGAACTGGGGA  
GCCGCCACCACCTCGGCCACCTCGTTCCACCCTTGCCGTCCGCGCTCAGGCCCCGCCCGCGGAG  
CCGCCGAGGGTTATATTGGGCCGGCCGAAGGTGGAGGCAGAGCGCAGCCGCGGCAGGCCAGCGGGGAG  
ATGCTGCCCGGAGGCTGGGAGCGGAAAGGCGGCTGCGGGCGCAGCGCCTCGGGGACTCGCCTCCGCGG  
GTGCTCAAGGCTGAAGGCGCCGGA

Figure S6. *JMJD1A* mRNA levels in prostate cancer. (A) Comparison of normal prostate gland to carcinoma in three different microarray data sets derived from the studies by Singh *et al* (8), Yu *et al* (9) and Lapointe *et al* (10). (B) Increased *JMJD1A* mRNA expression at metastatic sites compared to the primary tumor site. Microarray data sets were derived from Chandran *et al* (11), Yu *et al* (9) and LaTulippe *et al* (12). Data were analyzed by an unpaired, two-tailed Student's t-test.

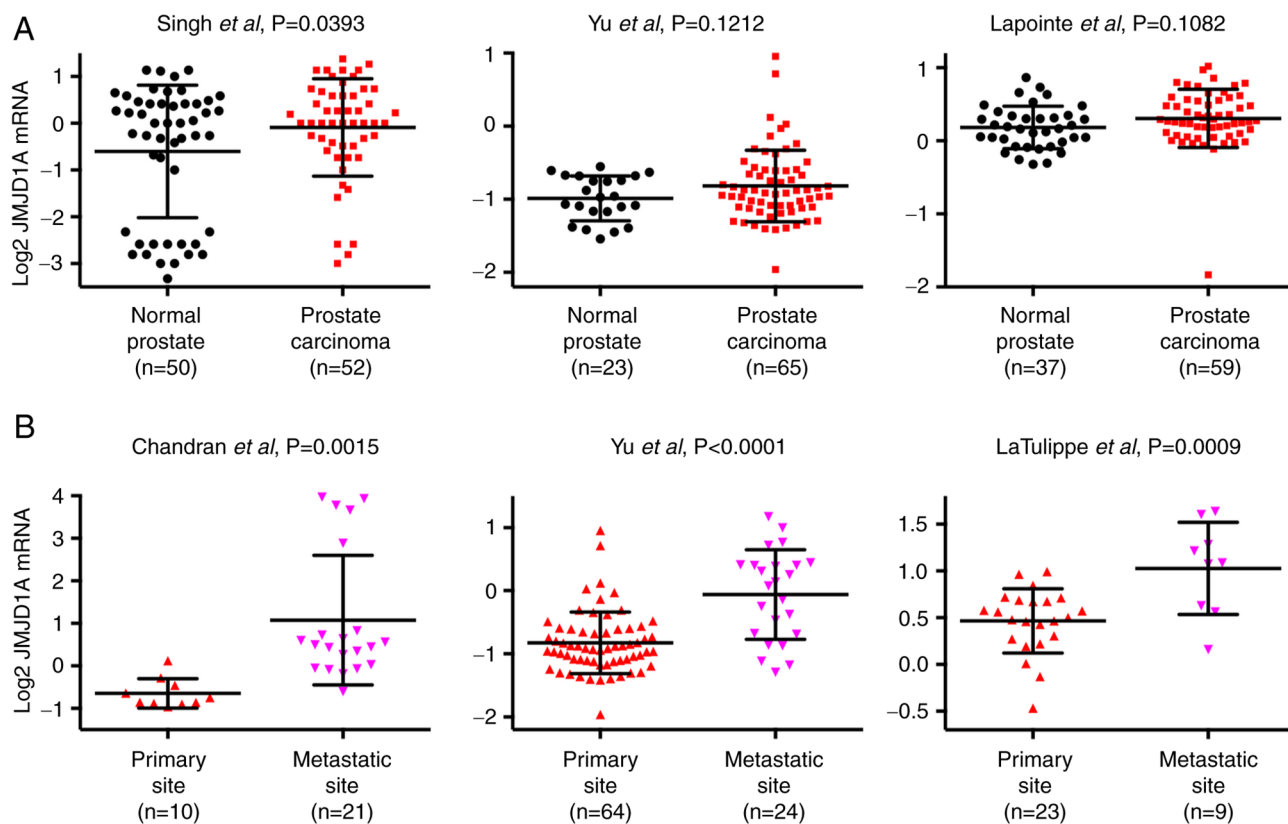

Figure S7. *FOXQ1* mRNA levels in prostate cancer. (A-D) Comparison of normal prostate gland to carcinoma at the primary site in four different microarray data sets derived from the studies by Arredouani *et al* (13), Grasso *et al* (14), Taylor *et al* (15) and Vanaja *et al* (16). Data were analyzed by an unpaired, two-tailed Student's t-test. (E and F) Decreased *FOXQ1* mRNA expression at metastatic sites compared to the primary tumor site. Microarray data sets were derived from the studies by Tamura *et al* (17) and Varambally *et al* (18).

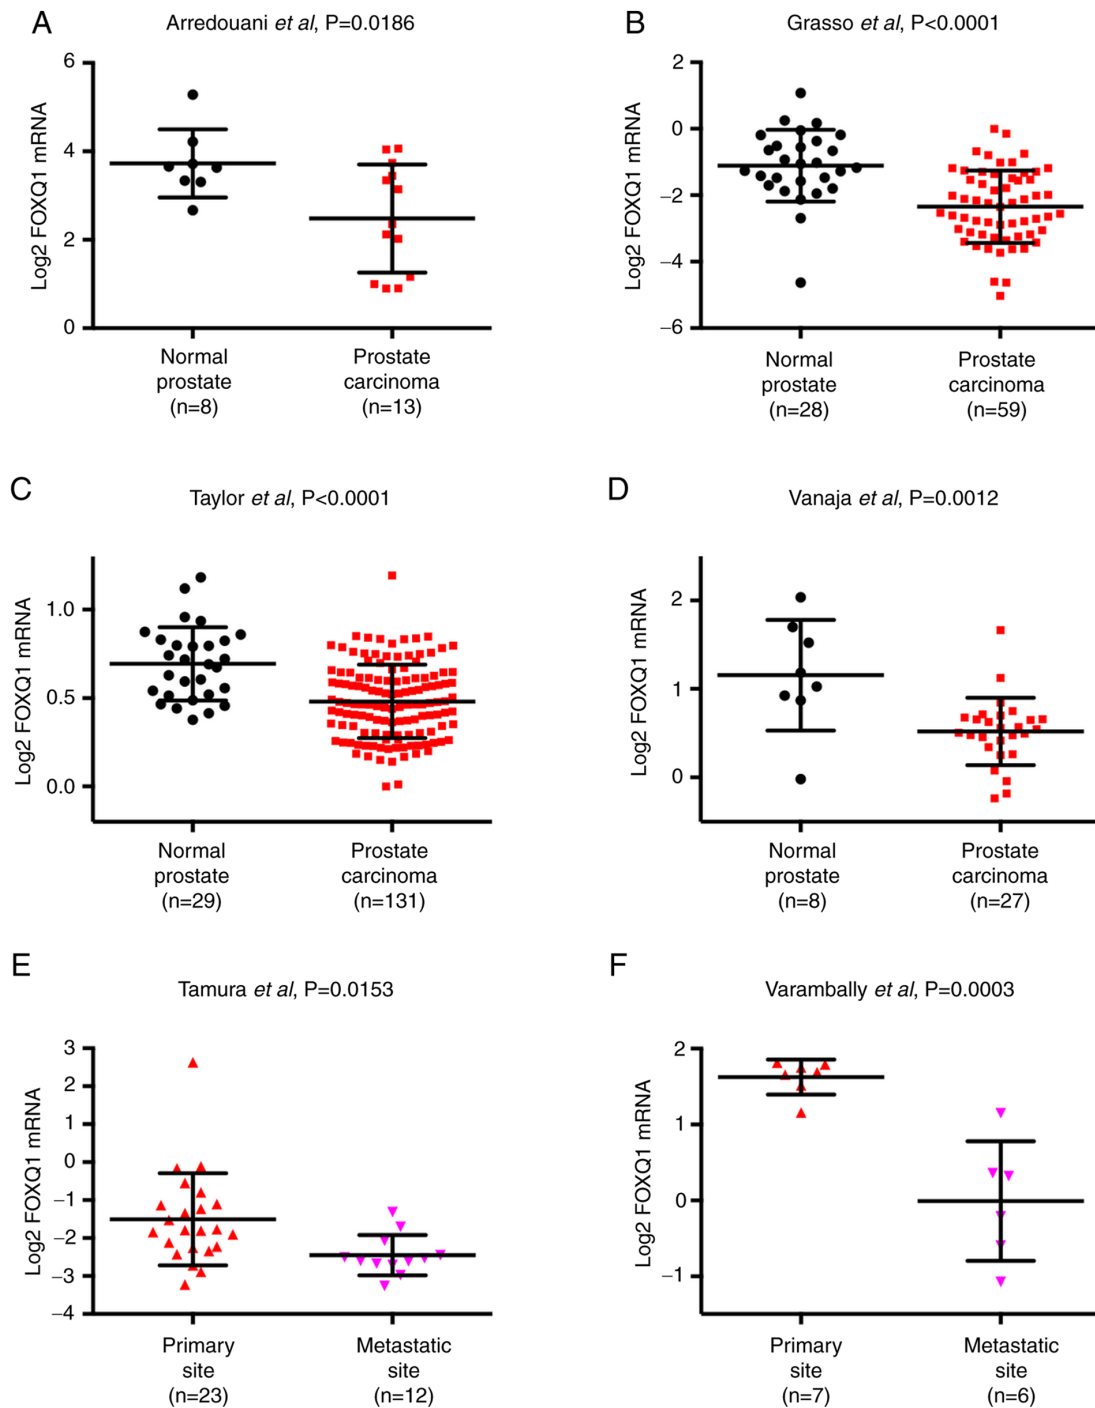

Figure S8. *MYCL* mRNA levels in colorectal and prostate cancer. (A) Comparison of normal colon to colon adenocarcinoma with regard to *MYCL* mRNA levels. Microarray data were derived from TCGA (4). Data were analyzed by an unpaired, two-tailed Student's t-test. (B and C) analogous, *MYCL* mRNA expression in colorectal tissue derived from microarray data published in the studies by Skrzypczak *et al* (3) and Gaedcke *et al* (19), respectively. (D-F) Likewise, *MYCL* upregulation in prostate carcinoma. Data are from the studies by Lapointe *et al* (10), Tomlins *et al* (20) and Yu *et al* (9), respectively.

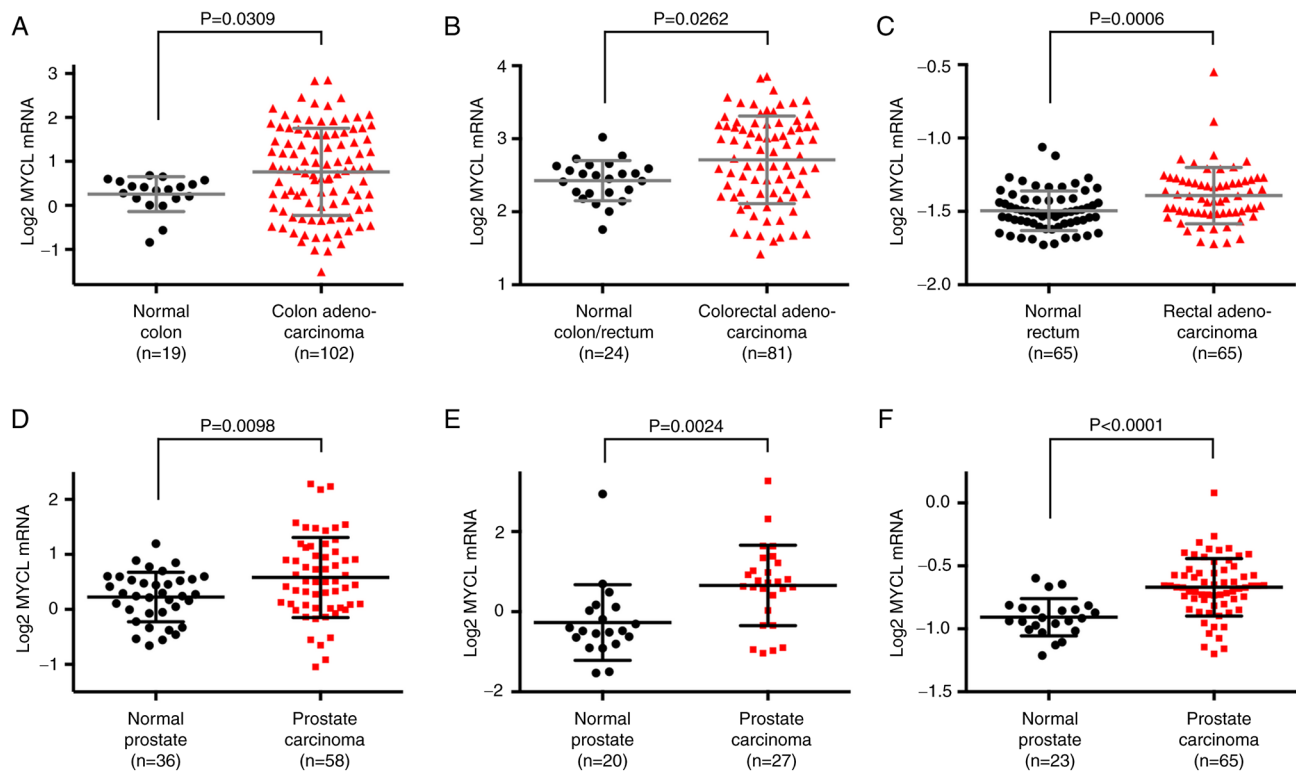



Table SI. Primer sequences used for RT-qPCR.

| Gene           | Forward primer (5'→3')     | Reverse primer (5'→3')     | Size (bp) |
|----------------|----------------------------|----------------------------|-----------|
| <i>ETV1</i>    | CCAGCTTTCTGAACCCTGTA ACTC  | CATATGCAAATCTCTGGGTTCTTG   | 233       |
| <i>GAPDH</i>   | GAGCCACATCGCTCAGACACC      | TGACAAGCTTCCC GTTCTCAGC    | 226       |
| <i>WNT7A</i>   | CCATCACAGCTGCCTGTACCCAG    | GTA CTGTGCCTTGAGCACGTAGC   | 344       |
| <i>WNT11</i>   | GTTTTCCGATGCTCCTATGAAGGTGA | CAGCTGTGCTTCCGTTGGATGTC    | 417       |
| <i>BHLHE40</i> | GGATCTCCTACCCGAACATCTCA    | GAGCGAAAGTCCGCTGGATGACTG   | 458       |
| <i>FOXQ1</i>   | GGACTTTGCACTTTGAATCCAGAG   | GCCCAGAAACCCCAAACAGTAGTC   | 353       |
| <i>KLF7</i>    | GAGTGGACAGAGCGACAGTGAC     | CCTTTAGACACTAGCCGATGCCATG  | 372       |
| <i>MYCL</i>    | TCGAAAGGCTGGGGCAGGAACTACG  | CAGCATAGTTGTGCTGTTGCTGATGG | 412       |
| <i>NFATC4</i>  | CTGCCAGCCAATATGAGCAGCTG    | AAGCTCAATGTCTGAATTCCGAAG   | 381       |
| <i>TBX6</i>    | GATCACACA ACTGAAGATTGCAGC  | CTCCAGAAATGCAGCCGAGTAGG    | 397       |
| <i>FAS</i>     | GGACCCAGAATACCAAGTGCAGATG  | GTCATGACTCCAGCAATAGTGGTG   | 361       |
| <i>TP53I3</i>  | GCACAGCTGCTATCCA ACTCACC   | GACCTCAGCAA ACTGGTGATCAGAC | 343       |

Table SII. Primer sequences used for ChIP assays.

| Region             | Forward primer                              | Reverse primer                                |
|--------------------|---------------------------------------------|-----------------------------------------------|
| <i>A (1st PCR)</i> | 1-for (5'-TAGACATAAAAAGGTGGGGCAGGTC-3')     | 569-rev (5'-GGAAGGATCGCGTTCCGGAGATTAGACTG-3') |
| <i>A (2nd PCR)</i> | 46-for (5'-GAAATCAGGGTAAGGAGAGGATCCC-3')    | 532-rev (5'-AGTATGCGCCTCGGGAGCCAGGTG-3')      |
| <i>B (1st PCR)</i> | 508-for (5'-CCACCTGGCTCCCGAGGCGCATAAC-3')   | 1052-rev (5'-GGATCTGACAGTCAACAGGAACGACG-3')   |
| <i>B (2nd PCR)</i> | 544-for (5'-GTCTAATCTCCGAACGCGATCCTTCC-3')  | 946-rev (5'-GCTGTGACCTCACTGGCACCAGTGT-3')     |
| <i>C (1st PCR)</i> | 1533-for (5'-CTAGACCCAGTCCCTTCAGGTGTCC-3')  | Rev-3' (5'-TCCGGCGCCTTCAGCCTTGA GCAC-3')      |
| <i>C (2nd PCR)</i> | 1595-for (5'-CACTCGCCTAAACTGCGTCCCCGAAC-3') | 2010-rev (5'-GCTGCGTCTCGCCTCCACCTTC-3')       |

## References

1. Smith JJ, Deane NG, Wu F, Merchant NB, Zhang B, Jiang A, Lu P, Johnson JC, Schmidt C, Bailey CE, *et al*: Experimentally derived metastasis gene expression profile predicts recurrence and death in patients with colon cancer. *Gastroenterology* 138: 958-968, 2010.
2. Kaiser S, Park YK, Franklin JL, Halberg RB, Yu M, Jessen WJ, Freudenberg J, Chen X, Haigis K, Jegga AG, *et al*: Transcriptional recapitulation and subversion of embryonic colon development by mouse colon tumor models and human colon cancer. *Genome Biol* 8: R131, 2007.
3. Skrzypczak M, Goryca K, Rubel T, Paziewska A, Mikula M, Jarosz D, Pachlewski J, Oledzki J and Ostrowski J: Modeling oncogenic signaling in colon tumors by multidirectional analyses of microarray data directed for maximization of analytical reliability. *PLoS One* 5: e13091, 2010.
4. Cancer Genome Atlas Network: Comprehensive molecular characterization of human colon and rectal cancer. *Nature* 487: 330-337, 2012.
5. Hong Y, Downey T, Eu KW, Koh PK and Cheah PY: A 'metastasis-prone' signature for early-stage mismatch-repair proficient sporadic colorectal cancer patients and its implications for possible therapeutics. *Clin Exp Metastasis* 27: 83-90, 2010.
6. Kim TD, Jin F, Shin S, Oh S, Lightfoot SA, Grande JP, Johnson AJ, van Deursen JM, Wren JD and Janknecht R: Histone demethylase JMJD2A drives prostate tumorigenesis through transcription factor ETV1. *J Clin Invest* 126: 706-720, 2016.
7. Wei GH, Badis G, Berger MF, Kivioja T, Palin K, Enge M, Bonke M, Jolma A, Varjosalo M, Gehrke AR, *et al*: Genome-wide analysis of ETS-family DNA-binding in vitro and in vivo. *EMBO J* 29: 2147-2160, 2010.
8. Singh D, Febbo PG, Ross K, Jackson DG, Manola J, Ladd C, Tamayo P, Renshaw AA, D'Amico AV, Richie JP, *et al*: Gene expression correlates of clinical prostate cancer behavior. *Cancer Cell* 1: 203-209, 2002.
9. Yu YP, Landsittel D, Jing L, Nelson J, Ren B, Liu L, McDonald C, Thomas R, Dhir R, Finkelstein S, *et al*: Gene expression alterations in prostate cancer predicting tumor aggression and preceding development of malignancy. *J Clin Oncol* 22: 2790-2799, 2004.
10. Lapointe J, Li C, Higgins JP, van de Rijn M, Bair E, Montgomery K, Ferrari M, Egevad L, Rayford W, Bergerheim U, *et al*: Gene expression profiling identifies clinically relevant subtypes of prostate cancer. *Proc Natl Acad Sci USA* 101: 811-816, 2004.
11. Chandran UR, Ma C, Dhir R, Bisceglia M, Lyons-Weiler M, Liang W, Michalopoulos G, Becich M and Monzon FA: Gene expression profiles of prostate cancer reveal involvement of multiple molecular pathways in the metastatic process. *BMC Cancer* 7: 64, 2007.
12. LaTulippe E, Satagopan J, Smith A, Scher H, Scardino P, Reuter V and Gerald WL: Comprehensive gene expression analysis of prostate cancer reveals distinct transcriptional programs associated with metastatic disease. *Cancer Res* 62: 4499-4506, 2002.
13. Arredouani MS, Lu B, Bhasin M, Eljanne M, Yue W, Mosquera JM, Bubley GJ, Li V, Rubin MA, Libermann TA and Sanda MG: Identification of the transcription factor single-minded homologue 2 as a potential biomarker and immunotherapy target in prostate cancer. *Clin Cancer Res* 15: 5794-5802, 2009.
14. Grasso CS, Wu YM, Robinson DR, Cao X, Dhanasekaran SM, Khan AP, Quist MJ, Jing X, Lonigro RJ, Brenner JC, *et al*: The mutational landscape of lethal castration-resistant prostate cancer. *Nature* 487: 239-243, 2012.
15. Taylor BS, Schultz N, Hieronymus H, Gopalan A, Xiao Y, Carver BS, Arora VK, Kaushik P, Cerami E, Reva B, *et al*: Integrative genomic profiling of human prostate cancer. *Cancer Cell* 18: 11-22, 2010.
16. Vanaja DK, Cheville JC, Iturria SJ and Young CY: Transcriptional silencing of zinc finger protein 185 identified by expression profiling is associated with prostate cancer progression. *Cancer Res* 63: 3877-3882, 2003.
17. Tamura K, Furihata M, Tsunoda T, Ashida S, Takata R, Obara W, Yoshioka H, Daigo Y, Nasu Y, Kumon H, *et al*: Molecular features of hormone-refractory prostate cancer cells by genome-wide gene expression profiles. *Cancer Res* 67: 5117-5125, 2007.
18. Varambally S, Yu J, Laxman B, Rhodes DR, Mehra R, Tomlins SA, Shah RB, Chandran U, Monzon FA, Becich MJ, *et al*: Integrative genomic and proteomic analysis of prostate cancer reveals signatures of metastatic progression. *Cancer Cell* 8: 393-406, 2005.
19. Gaedcke J, Grade M, Jung K, Camps J, Jo P, Emons G, Gehoff A, Sax U, Schirmer M, Becker H, *et al*: Mutated KRAS results in overexpression of DUSP4, a MAP-kinase phosphatase, and SMYD3, a histone methyltransferase, in rectal carcinomas. *Genes Chromosomes Cancer* 49: 1024-1034, 2010.
20. Tomlins SA, Mehra R, Rhodes DR, Cao X, Wang L, Dhanasekaran SM, Kalyana-Sundaram S, Wei JT, Rubin MA, Pienta KJ, *et al*: Integrative molecular concept modeling of prostate cancer progression. *Nat Genet* 39: 41-51, 2007.
